# Supplementary material for: Genetic Diversity and Population Structure of Corylus yunnanensis (Franch.) A. Camus Using Microsatellite Markers in Sichuan Province
Source: MDPI journal article supplement (doi:10.3390/f14050932), 2023-05-01
Supplement: s1 [file s1]

**Table S1.** Molecular variance analysis among and within 10 *C. yunnanensis* populations using 9 SSR loci.

| Source of variation | d.f. | Sum of squares | Mean square | Variance component | Percentage of variation (%) | P-value |
|---------------------|------|----------------|-------------|--------------------|-----------------------------|---------|
| Among populations   | 9    | 171.444        | 19.049      | 0.931              | 13%                         | 0.001   |
| Within populations  | 140  | 883.960        | 6.314       | 6.314              | 87%                         | 0.001   |
| Total               | 149  | 1055.404       |             | 7.245              | 100%                        |         |
