# Supplementary material for: Genetic Diversity and Population Structure of Corylus yunnanensis (Franch.) A. Camus Using Microsatellite Markers in Sichuan Province
Source: MDPI journal article supplement (doi:10.3390/f14050932), 2023-05-01
Supplement: s1 [file s1]

Archive with 2 entries (2 files):
- Figure S1. Estimated population structure (K=3) by STRUCTURE.pdf
- Table S1. Molecular variance analysis among and within 10 C. yunnanensis populations using 9 SSR loci.pdf
