# Supplementary figures and images for: Genetic Diversity and Population Structure of Corylus yunnanensis (Franch.) A. Camus Using Microsatellite Markers in Sichuan Province
Source: MDPI journal article supplement (doi:10.3390/f14050932), 2023-05-01

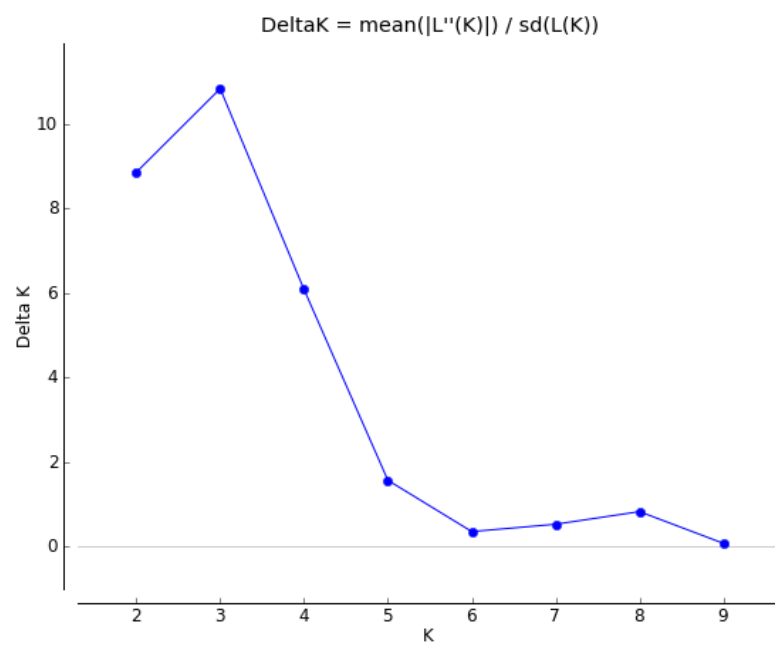

**Figure S1.** Estimated population structure (K=3) by STRUCTURE.

Supplement: s1 [file s1]
